1  
2 **Retroviral integration into nucleosomes through**  
3 **DNA looping and sliding along the histone octamer**

4  
5 Marcus D. Wilson<sup>1,§,%</sup>, Ludovic Renault<sup>1,§,#</sup>, Daniel P. Maskell<sup>2,&</sup>,  
6 Mohamed Ghoneim<sup>3</sup>, Valerie E. Pye<sup>2</sup>, Andrea Nans<sup>4</sup>, David S. Rueda<sup>3,5\*</sup>,  
7 Peter Cherepanov<sup>2,\*</sup>, Alessandro Costa<sup>1,\*</sup>  
8

9 <sup>1</sup>Macromolecular Machines Laboratory, The Francis Crick Institute, NW1 1AT, London, UK

10 <sup>2</sup>Chromatin structure and mobile DNA Laboratory, The Francis Crick Institute, NW1 1AT, London, UK

11 <sup>3</sup>Single Molecule Imaging Laboratory, MRC London Institute for Medical Science, W12 0NN, London,  
12 UK

13 <sup>4</sup>Structural Biology Science Technology Platform, The Francis Crick Institute, NW1 1AT, London, UK.

14 <sup>5</sup>Molecular Virology, Department of Medicine, Imperial College London, W12 0NN, London, UK

15 <sup>%</sup>Present address: Wellcome Centre for Cell Biology, University of Edinburgh, EH9 3JR Edinburgh,  
16 UK

17 <sup>#</sup>Present address: NeCEN, University of Leiden, 2333CC, Leiden, The Netherlands

18 <sup>&</sup>Present address: Faculty of Biological Sciences, LS2 9JT, Leeds, UK

19 <sup>§</sup>Equal contribution.

20 <sup>\*</sup>Correspondence: [alessandro.costa@crick.ac.uk](mailto:alessandro.costa@crick.ac.uk), [peter.cherepanov@crick.ac.uk](mailto:peter.cherepanov@crick.ac.uk) and  
21 [david.rueda@imperial.ac.uk](mailto:david.rueda@imperial.ac.uk).

22  
23  
24 **Abstract**

25 Retroviral integrase can efficiently utilise nucleosomes for insertion of the reverse-  
26 transcribed viral DNA. In face of the structural constraints imposed by the nucleosomal  
27 structure, integrase gains access to the scissile phosphodiester bonds by lifting DNA off the  
28 histone octamer at the site of integration. To clarify the mechanism of DNA looping by  
29 integrase, we determined a 3.9 Å resolution structure of the prototype foamy virus intasome  
30 engaged with a nucleosome core particle. The structural data along with complementary  
31 single-molecule Förster resonance energy transfer measurements reveal twisting and sliding  
32 of the nucleosomal DNA arm proximal to the integration site. Sliding the nucleosomal DNA  
33 by approximately two base pairs along the histone octamer accommodates the necessary  
34 DNA lifting from the histone H2A-H2B subunits to allow engagement with the intasome.  
35 Thus, retroviral integration into nucleosomes involves the looping-and-sliding mechanism for  
36 nucleosomal DNA repositioning, bearing unexpected similarities with chromatin remodelers.

37  
38

## 39 Introduction

40

41 Integration of the reverse-transcribed retroviral genome into a host-cell chromosome is  
42 catalysed by integrase (IN), an essential viral enzyme (reviewed in <sup>1</sup>). To carry out its  
43 function, a multimer of IN assembles on viral DNA (vDNA) ends forming a highly stable  
44 nucleoprotein complex, known as the intasome<sup>2-4</sup>. In its first catalytic step, IN resects 3' ends  
45 of the vDNA downstream of the invariant CA dinucleotides (3'-processing reaction). It then  
46 utilises the freshly released 3'-hydroxyl groups as nucleophiles to attack a pair of  
47 phosphodiester bonds on opposing strands of chromosomal DNA, cleaving host DNA and  
48 simultaneously joining it to 3' vDNA ends (strand transfer reaction)<sup>5,6</sup>.

49 Many important questions pertaining to the nature of the host-virus transactions on  
50 chromatin remain unanswered. In particular, it is unclear what role chromatin structure plays  
51 in the integration process. Strikingly, although only a fraction of the nucleosomal DNA  
52 surface is exposed within the nucleosome core particle (NCP)<sup>7-9</sup>, nucleosomal DNA packing  
53 does not impede and rather stimulates integration<sup>10-15</sup>. Because retroviral INs have long  
54 been known to prefer bent or distorted DNA targets, DNA bending as it wraps around the  
55 histone octamer was thought to facilitate integration into NCPs<sup>12,13</sup>. However, recent  
56 structural data revealed that retroviral intasomes require target DNA to adopt a considerably  
57 sharper deformation than the smooth bend observed on NCPs<sup>15-19</sup>.

58 Intasome structures from several retroviral genera have been determined by X-ray  
59 crystallography and cryo-EM <sup>4,17-20</sup>. Despite considerable variability, all intasomes were  
60 found to contain the structurally conserved intasomal core assembly minimally comprising  
61 four IN subunits synapsing a pair of vDNA ends. Depending on the retroviral species, the  
62 core assembly can be decorated by a number of additional IN subunits. The nucleoprotein  
63 complex from the prototype foamy virus (PFV) contains only a tetramer of IN, making this  
64 well-characterised intasome an ideal model to study the basic mechanisms involved in  
65 retroviral integration. Recently, we reported a cryo-EM structure of the pre-catalytic PFV  
66 intasome engaged with an NCP at 7.8 Å resolution<sup>15</sup>. Despite the modest level of detail, the  
67 cryo-EM data revealed that intasome induces the sharp bending of the nucleosomal DNA by  
68 lifting it off the face of the histone octamer at the site of integration. In doing so, the intasome  
69 makes supporting interactions with the H2A-H2B heterodimer and the second gyre of the  
70 nucleosomal DNA <sup>15</sup>. Due to the limited resolution of the original structure, it was impossible  
71 to visualise the conformational rearrangements in the nucleosomal DNA that lead to its  
72 disengagement from the nucleosomal core at the site of integration. Thus, it remains to be  
73 established whether nucleosomal DNA deformation at the integration site is merely  
74 accommodated by local deformation of the duplex DNA structure, or it rather involves global

75 repositioning of the nucleosomal DNA along the histone octamer. In addition, a systematic  
76 analysis is needed to understand potential role of histone tails in intasome engagement.

77 Herein, we employ a combination of cryo-EM and single-molecule FRET (smFRET) to  
78 understand what impact retroviral integration has on the structure of the target NCP. We find  
79 that strand transfer causes both nucleosomal DNA looping as well as sliding by two base  
80 pairs along the histone octamer. With our new findings we uncover unexpected similarities  
81 between the mechanisms of retroviral integration and ATP-dependent chromatin remodeling  
82 <sup>21-23</sup>.

83

## 84 **Results**

85

### 86 **Structure of Intasome-NCP strand-transfer complex**

87 To understand intasome strand transfer into NCPs, we assembled the complex of the PFV  
88 intasome and the NCP containing a native human DNA sequence (termed D02), selected for  
89 its ability to form a stable PFV-NCP complex<sup>15</sup>. Following isolation by size exclusion  
90 chromatography, the intasome-NCP complex was incubated in the presence of Mg<sup>2+</sup> to  
91 facilitate strand transfer<sup>15</sup>. We then used cryo-EM imaging and single-particle approaches to  
92 determine the structure of the resulting post-catalytic assembly to 3.9 Å resolution  
93 (**Supplementary Figure 1** and **Supplementary Table 1**). Docking known crystallographic  
94 coordinates into the cryo-EM map and use of real-space refinement allowed us to generate  
95 an atomic model of the Intasome-NCP strand transfer complex.

96 As previously observed, intasome engages the strongly preferred site on the nucleosomal  
97 DNA, at SHL 3.5 <sup>15,24</sup> (**Figure 1**). The new structure is overall similar to the original lower-  
98 resolution intasome-NCP complex, which was captured in the pre-catalytic state (**Figure**  
99 **1A**), confirming that strand transfer is not accompanied by large conformational  
100 rearrangements<sup>6</sup>. According to the atomic model, at the integration site, DNA is lifted by 7 Å  
101 from the histone octamer and bent to allow access to the IN catalytic centre, in excellent  
102 agreement with the earlier observations based on the crystal structure of the PFV strand  
103 transfer complex and the lower-resolution intasome-NCP cryo-EM data.

104 Local resolution is highest (~3.5 Å) for the histone octamer core, while DNA density on the  
105 outer perimeter tends to decrease (~4-4.5 Å), as observed previously for other NCP  
106 structures (**Supplementary Figure 1**) <sup>25-27</sup>. Nevertheless, we could confidently model the  
107 DNA phosphate backbone for the entire assembly. The integration site on the nucleosomal  
108 DNA is sandwiched between the histones and the intasome, resulting in higher local  
109 resolution (~3.7 Å). Notably, a discontinuity in the cryo-EM density resulting from the

110 nucleosomal DNA cleavage at the site of integration (**Figure 1B**) confirms that strand  
111 transfer has indeed occurred in our nucleoprotein assembly as observed biochemically<sup>15</sup>  
112 (**Supplementary Figure 2**).

113

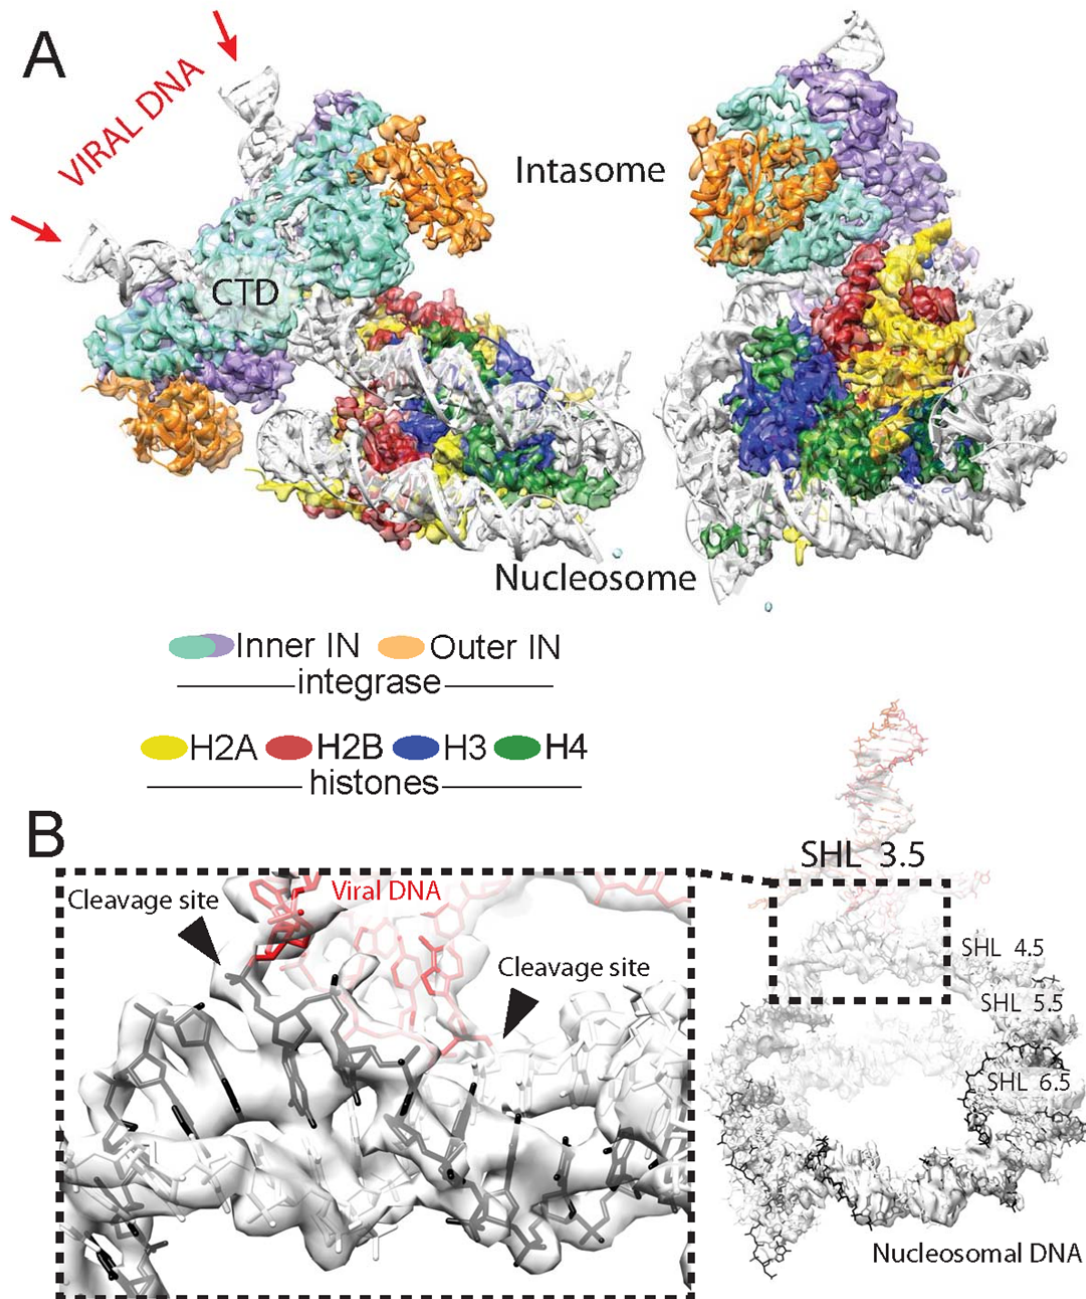

114

115 **Figure 1** Intasome-NCP strand-transfer complex visualised by cryo-EM. **(A)** 3.9 Å resolution structure  
116 of the post-catalytic intasome-NCP complex. **(B)** Covalently linked viral (red) and nucleosomal (black)  
117 DNA. Integration occurs at SHL location 3.5.

118 Table 1 Data collection and processing information

119

| Parameter                             | Intasome-NCP       | NCP-D02-strep       | 601 nucleosome      |
|---------------------------------------|--------------------|---------------------|---------------------|
| <b>Data Collection</b>                |                    |                     |                     |
| Microscope                            | FEI Titan Krios    | FEI Titan Krios     | FEI Titan Krios     |
| Detector                              | FEI Falcon II      | FEI Falcon III      | FEI Falcon III      |
| Acceleration voltage (kV)             | 300                | 300                 | 300                 |
| Number of micrographs                 | 4916               | 4182                | 1300                |
| Frames per micrographs                | 7                  | 30                  | 30                  |
| Frame rate (/s)                       | 4.3                | 60                  | 60                  |
| Dose per frame (e-/pixel)             | 9.86               | 1.12                | 1.24                |
| Accumulated dose (e-/Å <sup>2</sup> ) | 56                 | 28.3                | 31.3                |
| defocus range (µm)                    | 1.5-3.5            | 1.5-3.5             | 1.5-3.5             |
| <b>Frames</b>                         |                    |                     |                     |
| Alignment software                    | MotionCorr         | MotionCor2          | MotionCor2          |
| Frames used in final reconstruction   | 1-7                | 1-30                | 2-30                |
| Dose weighting                        | No                 | yes                 | yes                 |
| <b>CTF</b>                            |                    |                     |                     |
| Fitting software                      | CTFFIND3           | Gctf                | Gctf                |
| Correction                            | full               | full                | full                |
| <b>Particles</b>                      |                    |                     |                     |
| Picking software                      | Xmipp & Relion 1.3 | Relion 2.1          | Relion 2.1          |
| Picked                                | 989177             | 1131653             | 205680              |
| Used in final reconstruction          | 177155             | 62196               | 123123              |
| <b>Alignment</b>                      |                    |                     |                     |
| Alignment software                    | Relion 1.3         | Relion 2.1          | Relion 2.1          |
| Initial reference map                 | EMD-2992           | CryoSPARC ab initio | CryoSPARC ab initio |
| low pass filter limit (Å)             | 50                 | 50                  | 50                  |
| number of iterations                  | 25                 | 25                  | 25                  |
| local frame drift correction          | yes                | no                  | no                  |
| <b>Reconstruction</b>                 |                    |                     |                     |
| Reconstruction software               | Relion 1.3         | Relion 2.1          | Relion 2.1          |
| Box Size                              | 240x240x240        | 256 x 256 x 256     | 256 x 256 x 256     |
| Voxel size (Å)                        | 1.11               | 1.09                | 1.09                |
| Symmetry                              | C1                 | C1                  | C2                  |
| Resolution limit (Å)                  | 2.22               | 2.18 Å              | 2.18 Å              |
| Resolution estimate (Å)               | 3.9                | 4.2                 | 3.5                 |
| Masking                               | Yes                | Yes                 | Yes                 |
| Sharpening (Å <sup>2</sup> )          | Bfactor: -146      | Bfactor: -150       | Bfactor: -110       |
| EMDB ID                               | EMD-4960           | EMD-4692            | EMD-4693            |
| <b>Model building</b>                 |                    |                     |                     |
| Number of protein residues            | 1742               | 747                 |                     |
| Number of DNA residues                | 358                | 284                 |                     |
| Bond length outliers                  | 0.00%              | 0.00%               |                     |
| Bond angle outliers                   | 0.02%              | 0.00%               |                     |
| Bonds (R.M.S.D)                       | 0.010              | 0.008               |                     |
| Angles (R.M.S.D)                      | 1.183              | 0.856               |                     |
| Ramachandran favoured/outlier         | 94.3% / 0%         | 96.85% / 0%         |                     |
| Rotamer favoured/outlier              | 98.5 / 0%          | 99.51 / 0%          |                     |
| Clashscore                            | 10.55              | 4.91                |                     |
| Model vs Data CC (mask)               | 0.71               | 0.85                |                     |
| Molprobability score                  | 1.91               | 1.45                |                     |
| PDB ID                                | PDB: 6RNY          | PDB: 6R0C           |                     |

120

121

122 Intasome engages nucleosomal DNA non-symmetrically at two distinct sites: at the strand

123 transfer site as well as at the opposing gyre, which nestles in the cleft between one catalytic

124 and one outer IN subunit (**Figure 1A**). Near the integration site, the alpha C-helix of histone  
125 H2B makes direct contact with the C-terminal domain of one catalytically competent IN  
126 subunit, providing corroborating evidence for the reported role of IN residues Pro135,  
127 Pro239 and Thr240 in engaging C-terminal H2B<sup>15</sup>. The higher quality of the new cryo-EM  
128 map allowed us to build a backbone model for a segment of the N-terminal H2A tail,  
129 revealing close proximity between positively charged Lys-9 and Arg-11 on H2A and the  
130 catalytically competent IN C-terminal domain (**Figure 2A**). Coherently, we observe that  
131 complex formation is reduced with an NCP containing a histone H2A truncation of the first  
132 12, but not the first 8 residues (**Figure 2B**). Furthermore, Ala substitutions of either H2A at  
133 Lys-9 or Arg-11 affect complex stability, while a combination of the two substitutions fully  
134 abrogates the stable complex formation under conditions of the pull-down assay (**Figure**  
135 **2C**).

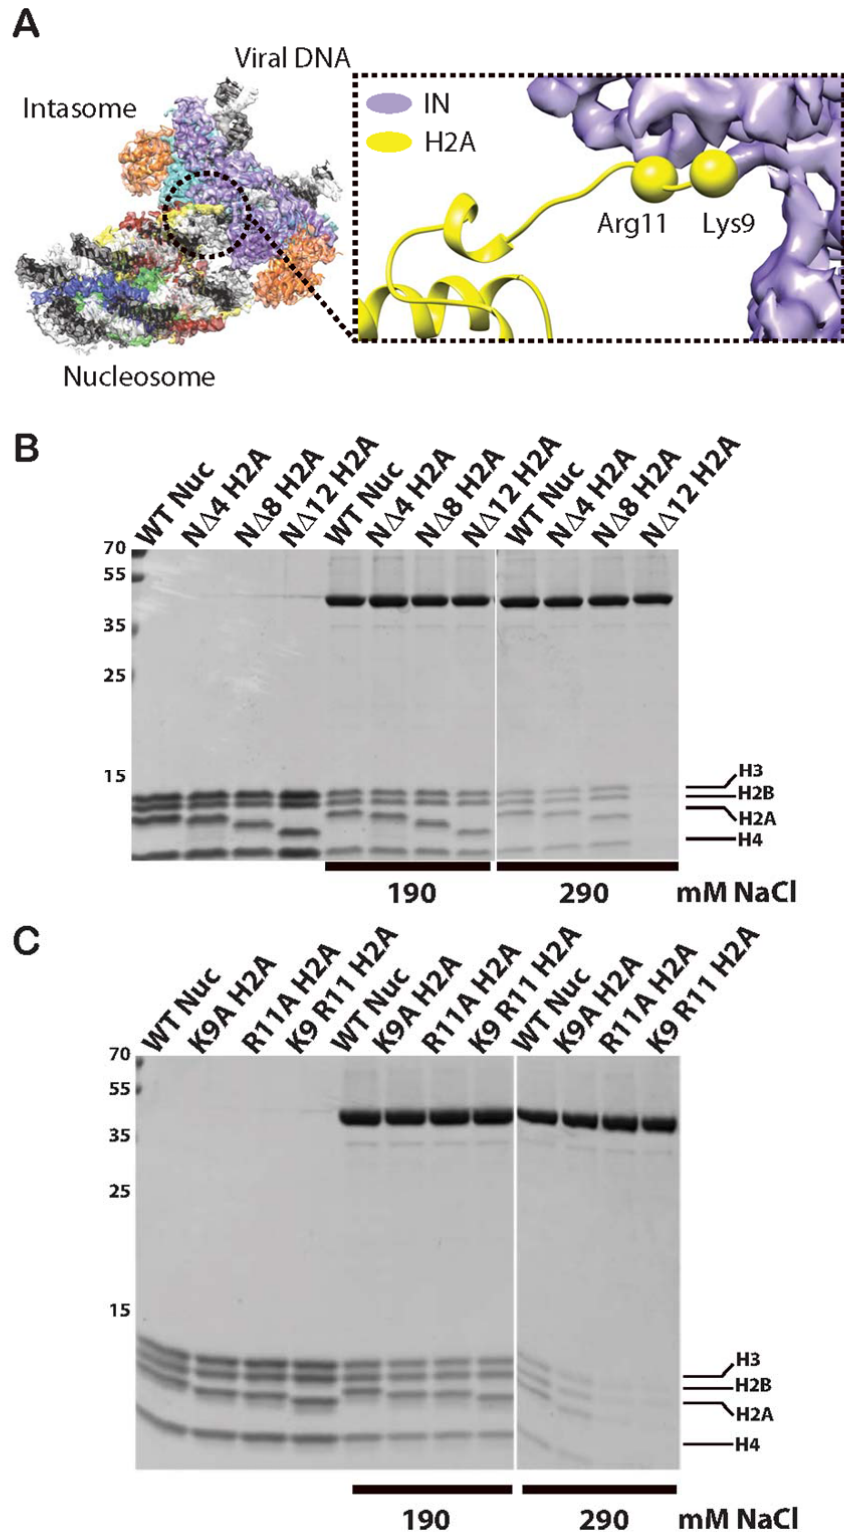

136

137

**Figure 2** Intasome interaction with the N-terminal histone H2A tail. **(A)** Histone H2A residues Lys-9

138

and Arg-11 play a key role in intasome-NCP interaction. **(B)** Pull-down assay with immobilised

139

intasome binding to NCP H2A tail deletion variants. **(C)** Pull-down assays with immobilised intasome

140

binding to NCP H2A N-terminal tail variants containing single- or double-point mutations.

141

## 142 **Asymmetric reconstruction of isolated NCP bearing the human D02 DNA sequence**

143 Similar to the pre-catalytic complex, our new structure of an intasome-NCP strand-transfer  
144 complex features a nucleosomal DNA loop bulging away from the protein octamer by  $\sim 7$  Å at  
145 the integration site. Although occurring at a different superhelical location, the DNA looping  
146 is reminiscent of structures of NCPs engaged by chromatin remodelers such as SWR1.  
147 Interestingly, DNA looping by SWR1 is accompanied by both sliding of nucleosomal DNA, as  
148 well as histone octamer distortion<sup>22</sup>. We wanted to test whether intasome-induced looping is  
149 compensated by nucleosomal DNA sliding along the histone octamer, as observed for  
150 chromatin remodelers. To this end, we decided to directly compare and contrast the cryo-EM  
151 structure of the intasome-NCP strand-transfer complex with that of an isolated NCP,  
152 containing the same native human D02 nucleosomal DNA sequence<sup>15</sup>.

153 Reconstructing a D02 NCP presented a number of significant challenges. Firstly, the NCP  
154 containing D02 DNA is less stable than NCPs wrapped with strongly positioning sequences  
155 such as Widom 601<sup>15,28</sup>. Our EM analysis of the isolated NCP D02 revealed that, unlike the  
156 intasome complex, D02 NCPs had the tendency to become unravelled, especially in the  
157 presence of higher salt (data not shown). However, exposure to mild crosslinking conditions  
158 (0.05% glutaraldehyde, 5 min, 4°C) yielded tractable particles that were visible on open-hole  
159 cryo grids. Importantly, mild NCP-crosslinking did not prevent intasome activity as measured  
160 in strand-transfer assays (**Supplementary Figure 2**). A second challenge was presented by  
161 the asymmetry of the D02 DNA sequence, which leads to the strongly preferred intasome  
162 capture at one side of the NCP<sup>15</sup>. Thus, to describe any intasome-dependent sliding along  
163 the histone octamer, we first had to reconstruct the D02 NCP avoiding two-fold averaging.  
164 However, both the histone octamer and the DNA backbone contain a prominent two-fold  
165 symmetric character, which strongly influence particle alignment and prevent asymmetric  
166 reconstruction. To facilitate asymmetric particle alignment, we introduced a biotin moiety on  
167 the end of the DNA arm distal from the integration site and decorated NCPs with streptavidin  
168 (**Figure 3A**). Critically, streptavidin attachment did not affect NCP stability, nor the ability of  
169 intasome to integrate into NCPs (**Supplementary Figure 2**). Crosslinked D02 NCPs,  
170 imaged by cryo-EM and analysed by two-dimensional (2D) averaging, revealed multiple  
171 views of the coin-shaped NCP assemblies (**Figure 3B**). Particles appeared decorated by  
172 diffuse density projecting from one DNA arm, which we assigned to streptavidin. Free  
173 streptavidin particles ( $\sim 75$  kDa) could also be identified amongst the 2D class averages  
174 (**Supplementary Figure 3**). Next, we used single-particle reconstruction to determine the  
175 4.2 Å resolution structure of NCP-D02-streptavidin complex (**Supplementary Figure 3** and  
176 **4**). As the streptavidin is linked to the 5' end of a distal DNA arm, it is less ordered than the  
177 rest of the assembly, and appears not to be engaged in any stabilising interaction with the



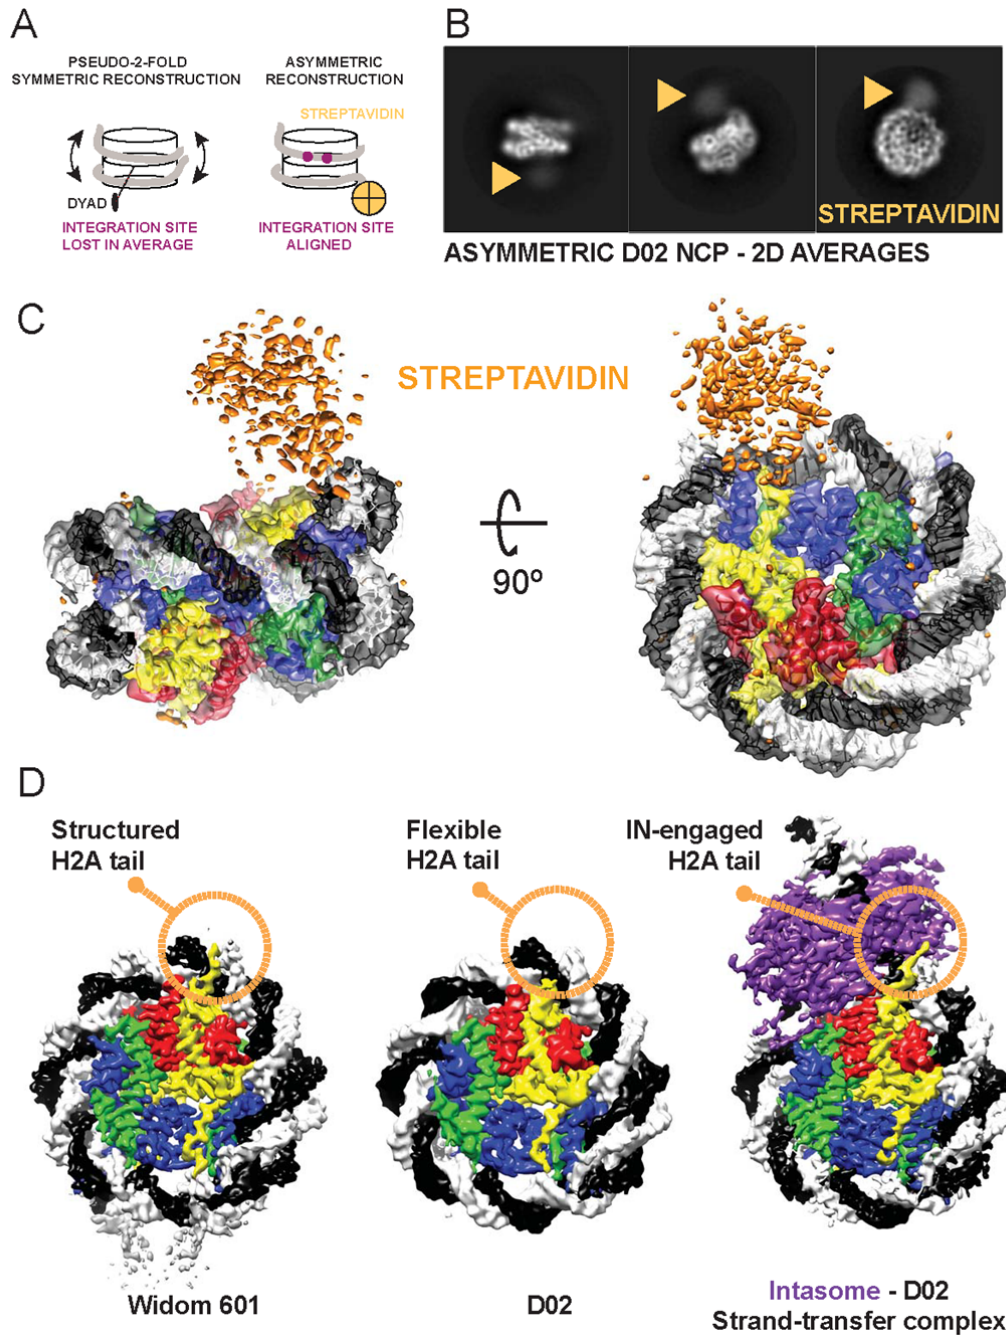

178

179 **Figure 3** Asymmetric reconstruction of the isolated D02 NCP. **(A)** Streptavidin labelling allows  
180 asymmetric reconstruction of the D02 NCP, which avoids pseudo-two-fold symmetry averaging of the  
181 integration-site DNA. **(B)** 2D averages of labelled D02 NCP particles reveal a discernible, diffuse  
182 density for streptavidin at the nucleosomal DNA arm distal from the integration site. **(C)** 3D  
183 reconstruction of D02 NCP reveals an asymmetric streptavidin label decorating one of two  
184 nucleosomal DNA arms. **(D)** Unlike for Widom 601, the D02 NCP contains limited density for the N-  
185 terminal H2A tail, indicating that this element is flexible and available for intasome engagement. In  
186 fact, in the Intasome-NCP strand-transfer complex the N-terminal H2A tail interacts with IN, stabilising  
187 the interaction (also see Figure 2B and C).

188 NCP core (**Figure 3C** and **Supplementary Figure 3**). Therefore, streptavidin helps align  
189 particles asymmetrically while seemingly not interfering with the NCP structure.

190 Originally selected from a genome-wide screen for strong intasome interactors, the D02  
191 DNA sequence allowed isolation of a mono-disperse intasome-NCP complex<sup>15</sup>. Detailed  
192 inspection of the isolated D02 NCP cryo-EM maps provides insight into intasome selectivity.  
193 Firstly, nucleosomal DNA arms appear to be flexible (as detected by inspection of the local  
194 resolution map reported in **Supplementary Figure 3**, and given the significant number of  
195 unwrapped NCPs averaged during analysis). We asked whether the same flexibility could be  
196 observed for a NCP containing a strong positioning sequence such as Widom 601, which is  
197 a poor substrate for intasome binding and integration. To this end, we solved the 3.5 Å  
198 resolution cryo-EM structure of a Widom-601-wrapped nucleosome containing strongly  
199 positioned Widom-601 sequence with 13-bp long linker DNA arms (**Supplementary Figure**  
200 **5**). Only linker DNA fragments display a degree of flexibility in the Widom 601 structure. We  
201 postulated at this stage that flexible NCP arms in D02 might favour nucleosomal DNA  
202 repositioning required to support DNA looping, prompting us to further investigate the  
203 mechanism.

204 A second notable feature in the D02 NCP structure is the limited interaction between DNA  
205 and the N-terminal tail of H2A, reflected by poorly defined density contacting nucleosomal  
206 DNA at SHL 4.5. This differs for example from our structure of Widom 601 NCP, which  
207 shows discrete ordering of H2A N-terminal tail in the minor groove of nucleosomal DNA at  
208 the equivalent position, in agreement with previous crystallography and cryo-EM studies<sup>7,29-</sup>  
209 <sup>31</sup>. We speculate that loose DNA-engagement renders the histone H2A tail available for  
210 intasome binding as observed in our strand-transfer complex, hence improving substrate  
211 selection (**Figure 3D**).

## 212 **Retroviral integration causes a shift in nucleosomal DNA register**

213 To understand the impact of retroviral integration on NCP architecture, we analysed the  
214 structural changes in the NCP that accompany productive engagement with the intasome.  
215 Comparison of the intasome-D02 NCP structures prior to and after strand transfer shows  
216 that histones undergo relatively minor distortions with a global r.m.s. deviation of backbone  
217 atom positions of 2.7 Å (**Supplementary Figure 6**). Conversely, in our atomic model DNA  
218 looping at the integration site is compensated by a significant change in nucleosomal DNA  
219 register, with the nucleosomal DNA arm proximal to the integration site shifting by 2 bp  
220 (**Figure 4A**). This shift in register extends from SHL 7 to SHL 2.5, where an interaction with  
221 H3 element L1 appears to hold DNA in place and limit downstream sliding of the double  
222 helix (**Figure 4B** and **Supplementary Movie 1**).

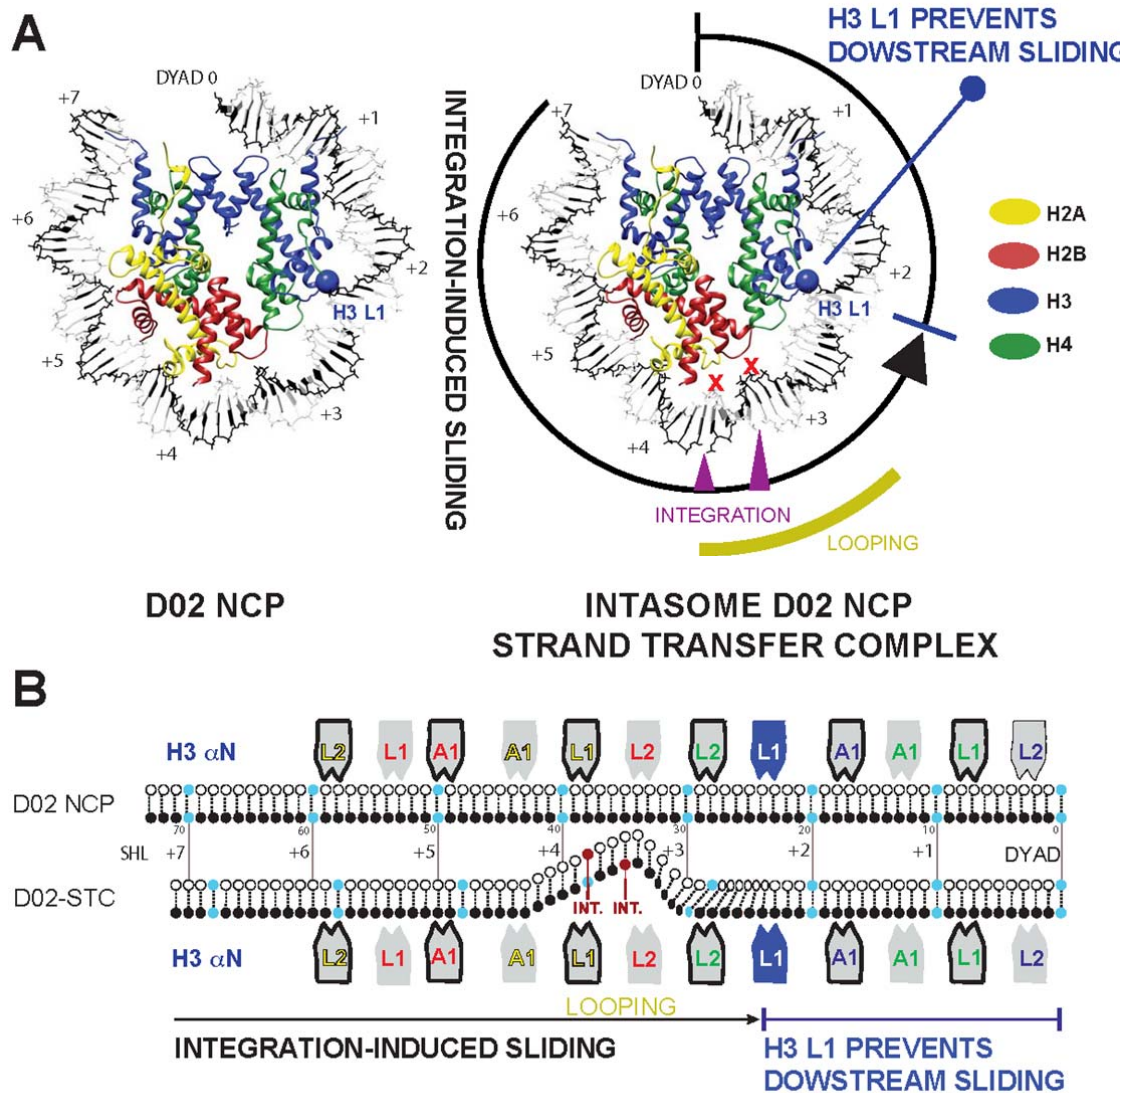

223

224 **Figure 4** Integration-promoted DNA sliding observed by cryo-EM. **(A)** On the left, slabbed view of the  
 225 isolated D02 NCP. Histone H3 L1 element is highlighted with a blue ball. On the right, DNA looping  
 226 required for retroviral integration causes a shift in the DNA register, which extends from SHL 7 to 2.  
 227 Histone H3 L1 element prevents downstream DNA sliding. **(B)** Schematic representation of  
 228 integration-induced NCP remodelling.

229

230 To validate the DNA-register change observed in our structural models, we turned to a  
 231 single molecule Förster resonance energy transfer (FRET) assay. We used a Cy3 donor to  
 232 label the 5'-terminal end of the nucleosomal DNA closest to the integration site, and a Cy5-  
 233 maleimide-cysteine acceptor engineered at position 119 of H2A (**Figure 5A**). Histone  
 234 labelling was optimised to yield approximately one fluorophore per octamer. Surface-  
 235 immobilised NCPs were imaged by FRET in the absence or presence of the intasome and/or

236  $Mg^{2+}$  (**Figure 5B**). In reconstituted NCPs, single H2A labels were found either proximal to, or  
237 distal from, the Cy3-modified DNA end. The main energy transfer group deriving from the  
238 proximal fluorophore pair centred around 0.95 FRET efficiency, while the second distal  
239 fluorophore pair peak centred around 0.37 transfer efficiency (**Supplementary Figure 7A**).  
240 We focused our analysis on the 0.95 FRET group, as any shift in nucleosomal DNA register  
241 would cause more pronounced changes in FRET efficiency in this population. In all tested  
242 conditions, FRET efficiency was stable, with a minor population (~10%) of traces exhibiting  
243 slight changes in FRET intensity (**Figure 5C** and **Supplementary Figure 7B**).  
244 Supplementing the NCP with intasome or  $Mg^{2+}$  did not result in any significant FRET change  
245 (**Figure 5D** and **5E**). However, when strand transfer was induced by adding both intasome  
246 and  $Mg^{2+}$  (**Supplementary Figure 7**), a separate, ~0.8 FRET population appeared (**Figure**  
247 **5F**). This second population is consistent with a shift in register of the DNA moving away  
248 from the K119C-Cy5 H2A residue (**Figure 5A**). These data are in good agreement with our  
249 comparative cryo-EM analysis indicating that intasome-mediated looping required for  
250 integration promotes sliding of nucleosomal DNA (**Figure 4A**). In fact, the observed drop in  
251 FRET efficiency indicates a small but significant shift in the DNA register that corresponds to  
252 less than 4 bp, according to a calibration previously obtained with Widom 601 NCPs<sup>22</sup>.  
253 Crystallographic and cryo-EM structures of pre-catalytic assemblies of intasome bound to  
254 DNA or nucleosomes established that target capture alone leads to DNA bending and  
255 nucleosomal DNA remodelling<sup>15,16</sup>. The new post-catalytic intasome-NCP structure reported  
256 here confirms that no change of DNA looping occurs at the integration site after strand  
257 transfer. However, in our single molecule experiments where intasome was added to  
258 nucleosomes tethered to glass slides, a drop in FRET efficiency was only observed in the  
259 presence of magnesium required for integration. Although this observation was surprising to  
260 us, it is reasonable to infer that the increased stability obtained with covalent link formation  
261 yields consistent FRET efficiency-drop derived from intasome binding and nucleosomal DNA  
262 repositioning.

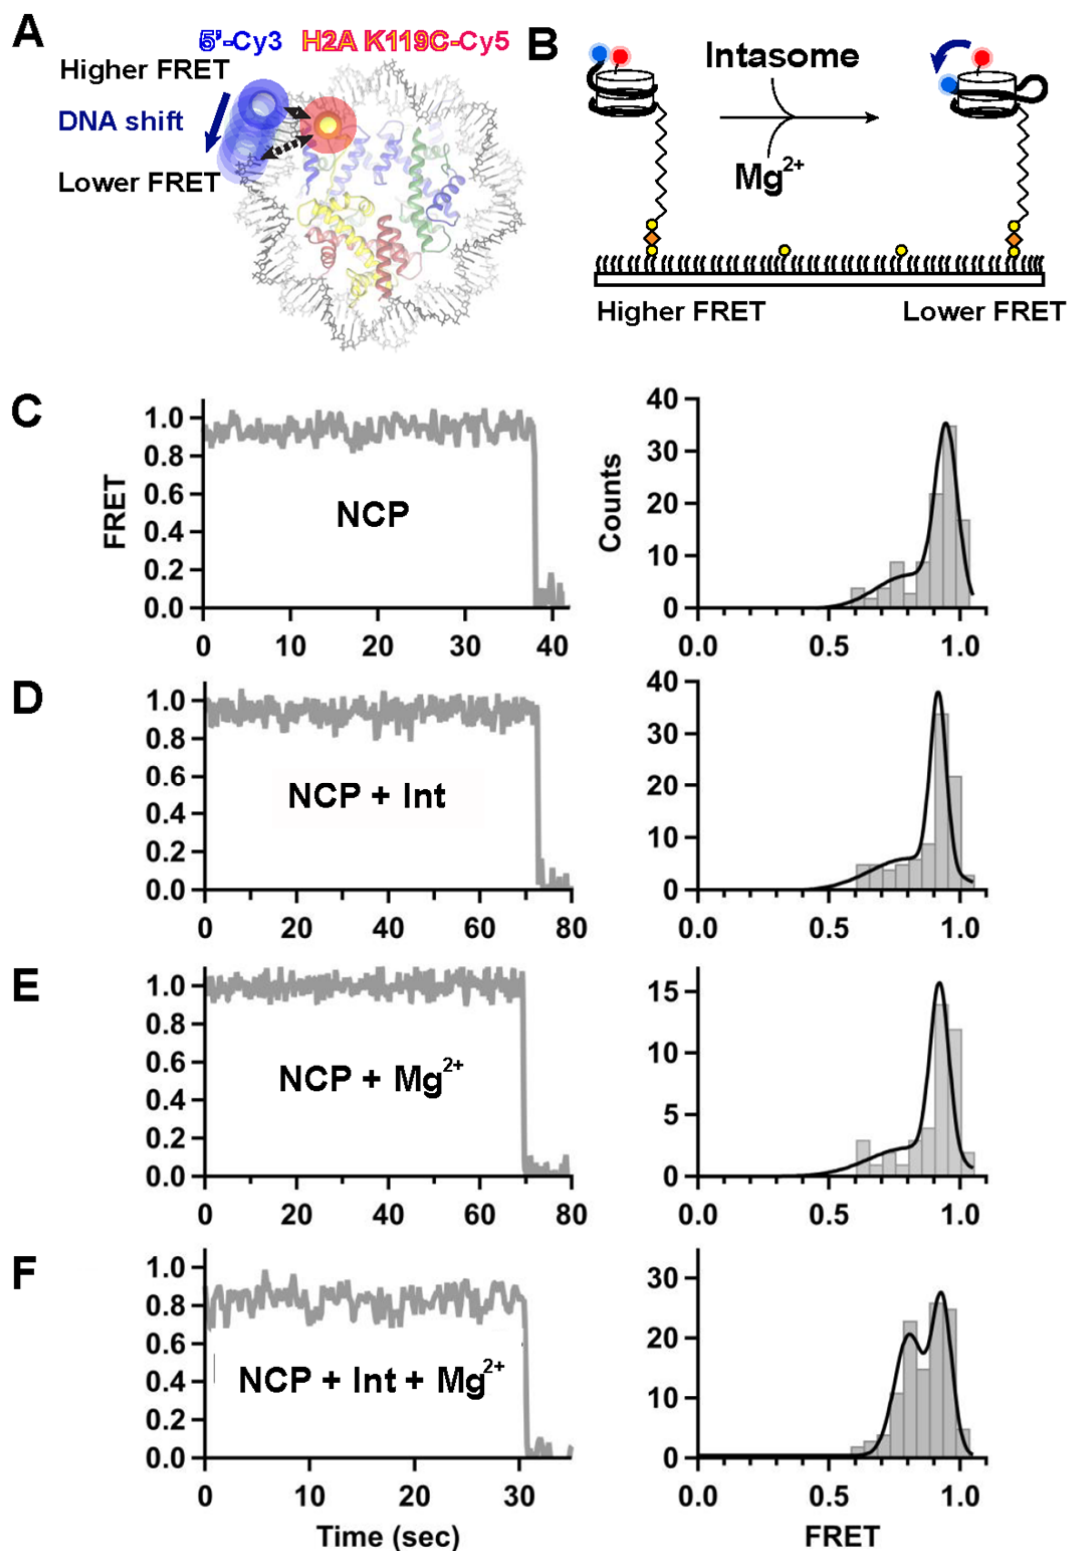

263

264 **Figure 5** Integration-promoted nucleosomal DNA sliding observed by single molecule FRET. (A)  
265 Fluorescently labelled NCP: labelled octamer (Cy5 on H2A, red) wrapped with biotinylated labelled  
266 DNA (Cy3 on exit site, blue). (B) NCPs are surface-immobilised on neutravidin (orange) coated biotin-  
267 PEG (yellow) slides. Intasome-induced translocation in the presence of magnesium is detected as a

268 FRET decrease. Representative single-molecule FRET trajectories (left) and histograms (right) of  
269 NCPs (**C**) without intasome or magnesium (N = 105), (**D**) in the presence of intasome (N = 93), (**E**) in  
270 the presence of magnesium (N = 42), and (**F**) in presence of both intasome and magnesium (N =  
271 115). A significant population shift to ~0.8 FRET in the presence of both intasome and magnesium.  
272 Data were collected at 100 ms/frame (10 Hz) and smoothed with a 3-point moving average. Black  
273 lines in FRET histogram are fits to two Gaussian distributions.

## 274 **Discussion**

275 Over the last 35 years macromolecular crystallography has provided several high-resolution  
276 views of the NCP and its binding partners. These efforts led to describing the NCP  
277 architecture at an atomic level<sup>7-9</sup>, explained how DNA sequence can influence wrapping of  
278 the double helix<sup>32</sup>, and how common docking sites on the histone octamer are recognised by  
279 different interactors<sup>33-37</sup>. Over the last four years, cryo-EM has started to provide a dynamic  
280 view of the NCP<sup>25,38-41</sup>. Recent data indicated that NCPs are more flexible in solution, with  
281 the histone octamer visiting more compacted or extended states, compared with a  
282 nucleosome trapped in a crystal lattice<sup>42</sup>. NCP unwrapping has been visualised with cryo-  
283 EM, for example in the context of the hexasome, which is an NCP with partially unpeeled  
284 DNA, due to the loss of one H2A/H2B dimer<sup>27</sup>. Spectacular views of progressively  
285 unwrapped NCPs have been obtained for transcribing RNA polymerase II captured during  
286 NCP passage<sup>43,44</sup>. Moreover, cryo-EM provided the first glimpses of ATP-dependent NCP  
287 translocation through a mechanism involving DNA looping and sliding along the histone  
288 octamer<sup>22,38,45-51</sup>.

289 Our high-resolution view of a post-catalytic intasome-NCP complex provides a new example  
290 of a local remodeling of nucleosomal DNA. Although previous work established formation of  
291 a DNA loop during productive intasome-NCP interaction, it was not clear whether the loop  
292 forms by local stretching of the double helix or through a shift in nucleosomal DNA register.  
293 Because IN must catalyse only one strand transfer event and does not need to cycle  
294 between states on the chromatin, it does not depend on a power source, unlike ATP-driven  
295 translocases and NCP remodelers. Therefore, all conformational DNA rearrangements are  
296 offset by energy released with the formation of the intasome-NCP interface. Nevertheless,  
297 similarities with the mechanism of DNA translocation of chromatin remodelers can be  
298 identified. In fact, in both systems, DNA is looped out of the histone core, causing a  
299 compensatory register shift of the double helix wrapped around the octamer. Nucleosomal  
300 DNA looping at SHL 3.5 is required for access to the IN active site<sup>15</sup>, and causes DNA  
301 sliding around the histone octamer, with global repositioning extending from SHL 7 to SHL 2.  
302 At this site, histone H3 element L1 holds the sugar-phosphate backbone in place, preventing  
303 any further downstream shift in DNA register (**Figure 4B** and **Supplementary Movie 1**).

304 Using cryo-EM, Kurumizaka and colleagues have recently shown that the same H3 L1-DNA  
305 interaction stalls RNA polymerase II during NCP passage<sup>43</sup>. ATP-powered translocases  
306 such as Swr1 and Snf2 have been observed to engage and loop out SHL 2 DNA, disrupting  
307 the H3 L1-DNA interaction <sup>22,45,52</sup>. It is tempting to speculate that the concerted action of IN  
308 and SHL 2 remodelers could act synergistically during DNA unpeeling and strand-transfer  
309 complex disassembly, required to complete retroviral integration. In support of this notion, a  
310 functional coupling during retroviral integration has been reported between HIV-1 integrase  
311 and Snf2-related SWI/SNF chromatin remodelling complex <sup>53</sup>.

312

313

314 **Supplementary Movie 1:** Nucleosome core particle morphed between the isolated and the strand  
315 transfer complex state.

316

317

## 318 **Materials and Methods**

319

### 320 **Intasome purification**

321 The intasome was assembled using recombinant PFV IN and double stranded synthetic  
322 oligonucleotides mimicking the pre-processed U5 end of the vDNA as previously  
323 described<sup>4,15</sup>. Briefly, hexahistidine-tagged IN was overexpressed in BL-21 CodonPlus RIL  
324 cells (Agilent). Cells were lysed in 25 mM Tris-HCl pH 7.4, 0.5 M NaCl, 1 mM PMSF by  
325 sonication; clarified lysate supplemented with 20 mM imidazole was applied to packed,  
326 equilibrated Ni-NTA resin (Qiagen). The resin and washed extensively in lysis buffer  
327 supplemented with 20 mM imidazole. Bound proteins were eluted with lysis buffer  
328 supplemented with 200 mM imidazole and protein-containing fractions were supplemented  
329 with 5 mM DTT. The hexahistidine-tag was cleaved by incubation with human rhinovirus 14  
330 3C protease. The protein, diluted to reduce the NaCl concentration to 200 mM, was loaded  
331 onto a HiTrap Heparin column (GE Healthcare). IN was eluted using a linear gradient of  
332 0.25-1 M NaCl. IN-containing fractions were concentrated and further purified by size  
333 exclusion chromatography through a Superdex-200 column (GE Healthcare), equilibrated in  
334 25 mM Tris pH 7.4, 0.5 M NaCl. Protein, supplemented with 10% glycerol and 10 mM DTT,  
335 was concentrated to 10 mg/ml, as estimated by spectrophotometry at 280 nm and stored at -  
336 80°C.

337 To assemble the intasome a mixture containing 120  $\mu$ M PFV IN and 20  $\mu$ M pre-annealed  
338 DNA oligonucleotides 5'-TGCGAAATTCCATGACA and 5'-ATTGTCATGGAATTTTCGCA  
339 (IDT) in 500 mM NaCl was dualized against 50mM BisTris propane-HCl pH 7.45, 200 mM  
340 NaCl, 40  $\mu$ M ZnCl<sub>2</sub>, 2 mM DTT for 16 h at 18°C. Following dialysis, the assembly reaction,  
341 supplemented with NaCl to a final concentration of 320 mM, was incubated on ice for 1 h  
342 prior to purification on Superdex-200 column in 25 mM Bis-Tris propane-HCl pH 7.45, 320  
343 mM NaCl. Purified intasome, concentrated by ultrafiltration, was kept on ice for immediate  
344 use.

345

### 346 **NCP formation**

347 NCPs were assembled essentially as described<sup>15,54</sup>. Briefly Human H2A, H2A K119C, H2B,  
348 H3.3, H3.1 C96SC110A and H4 were over-expressed in *E.coli* and purified from inclusion  
349 bodies. Histones were refolded from denaturing buffer through dialysis against 10 mM Tris-  
350 HCl pH 7.5, 2 M NaCl, 5 mM beta-mercaptoethanol, 1 mM EDTA buffer, and octamers were  
351 purified by size exclusion chromatography over a Superdex-200 column (GE Healthcare).  
352 DNA fragments for wrapping NCPs (171-bp Widom-601 DNA, 145-bp D02 DNA or D02 DNA  
353 appended with biotin and fluorophores) were generated by PCR using Pfu polymerase and



354 HPLC-grade oligonucleotides (IDT). PCR products generated in 96-well plates (384 x 100  $\mu$ l)  
355 were pooled, filtered and purified on a ResorceQ column as described<sup>15</sup>. NCPs were  
356 assembled by salt dialysis as described<sup>15,29,54</sup> and heat repositioned at 37°C for 30 minutes.  
357 D02 containing NCPs were further purified using a PrepCell apparatus with a 5%  
358 polyacrylamide gel (BioRad).

359

#### 360 **NCP-streptavidin complex formation**

361 Purified *Streptomyces avindii* streptavidin powder (Sigma-Aldrich) was resuspended in 20  
362 mM HEPES-NaOH pH 7.5, 150 mM NaCl at a final concentration of 35  $\mu$ M. A derivative of  
363 D02 DNA was used for NCP reconstitution, containing a 5' biotin moiety on the exit arm  
364 distal from the intasome-engagement site. To form the NCP-streptavidin complex,  
365 biotinylated D02 NCP (0.5  $\mu$ M) was incubated with 0.3  $\mu$ M streptavidin for 10 minutes at  
366 room temperature in 20mM HEPES pH7.5, 150 mM NaCl, 1 mM DTT, 1mM EDTA.

367

#### 368 **EM sample preparation**

369 The intasome-DO2 NCP complex was formed and purified by size exclusion  
370 chromatography as previously described<sup>15</sup>. To allow strand transfer, the complex was  
371 incubated in the presence of 5 mM MgCl<sub>2</sub> for 30 minutes at room temperature. Cryo-EM  
372 sample preparation was performed as follows. 4  $\mu$ l of the integration reaction were applied to  
373 plasma cleaned C-Flat 1/1 400 mesh grids. After 1 minute incubation, grids were double side  
374 blotted for 3.5 seconds using a CP3 cryo-plunger (Gatan), operated at 80% humidity, and  
375 quickly plunge-frozen into liquid ethane. Ice quality was checked using a JEOL-2100 Lab6  
376 operated at 120kV, using a 914 side-entry cryo-holder (Gatan), and images were recorded  
377 on an UltraScan 4kx4k camera (Gatan). The best cryo-grids were retrieved, stored into liquid  
378 nitrogen and later shipped into a dry-shipper to NeCEN (University of Leiden, The  
379 Netherlands). At NeCEN, grids were loaded into a Cs corrected Titan Krios microscope and  
380 the data was collected over two different sessions using the EPU software (ThermoFisher  
381 Scientific). Images were recorded at a nominal magnification of 59,000 X on Falcon II direct  
382 electron detector yielding a pixel size of 1.12 Å / pixel with a defocus range of -1.5 to -3.5  
383  $\mu$ m. Data were collected as movies of 7 frames over 1.6 seconds giving a total applied dose  
384 of 56 electrons / Å<sup>2</sup>. A total of 4,916 movies were collected.

385 The D02 NCP biotin-streptavidin complex was gently cross-linked with 0.05% glutaldehyde  
386 at room temperature for 5 minutes, prior to quenching with 50 mM TrisHCl pH 7.5. the  
387 complex was concentrated and buffer exchanged using a 50-kDa spin concentrator  
388 (Amicon) into 10 mM Tris-HCl pH 7, 20 mM NaCl, 1 mM EDTA, 1 mM DTT; 3.5  $\mu$ l sample at  
389 80 ng/ $\mu$ l (DNA concentration based on spectrophotometry) was added to Quantifoil 2/2 grids,

390 with fresh carbon evaporated onto the grids to better control ice thickness. Grids were glow  
391 discharged at 40mA for 1 minute. Sample was blotted in a Vitrobot Mark IV using -1 offset,  
392 15 sec wait time and 2.5 sec blot at 4°C and 100% humidity, before plunge-freezing in liquid  
393 ethane. Grids were vitrified in liquid ethane and stored in liquid nitrogen prior to loading on a  
394 Titan Krios operated at 300kV. Data was acquired using a Falcon III detector operating in  
395 counting mode using a pixel size of 1.09 Å, a total dose of 30 electrons/Å<sup>2</sup> and a defocus  
396 range from -1.5 to -3.5 µm. A total of 4,182 movies were collected automatically using the  
397 EPU software (ThermoFisher Scientific). The Widom 601 NCP sample was applied to freshly  
398 glow discharged Quantifoil 2/2 grids and sample was blotted in a Vitrobot Mark IV using -1  
399 offset, 10 sec wait time and 3.5 sec blot at 4°C and 100% humidity, before plunge-freezing  
400 in liquid ethane. Data was acquired using a Falcon III detector operating in counting mode  
401 using a pixel size of 1.09 Å and total dose of 30 electrons / Å<sup>2</sup>. A total of 1,300 Micrographs  
402 were collecting using automated EPU software.

403

#### 404 **Cryo-EM image processing**

405 For the intasome-DO2 NCP complex dataset (**Supplementary Figure 1**), movie frames  
406 were corrected for to beam-induced drift<sup>55</sup> and a sum of each aligned movie was used in the  
407 first steps of image processing. All movies showing any remaining drift or containing ice  
408 were discarded at this stage, and only the best 3,125 movies were selected for further image  
409 processing. First, 989,177 particles were automatically picked using Xmipp<sup>56</sup> and Relion  
410 version 1.3<sup>57</sup>. Contrast transfer function parameters were estimated using CTFFIND3<sup>58</sup>, and  
411 all 2D and 3D classifications and 3D refinements were performed using RELION<sup>57</sup>. After 2  
412 rounds of 25 iterations of 2D classification, 335,989 particles remained and were subjected  
413 to 3D classification using the pre-catalytic intasome-NCP map<sup>15</sup>, filtered to 50 Å resolution,  
414 as a starting model. To speed up calculations, 8 classes were generated with a 15 degrees  
415 angular sampling. The best 3 classes were merged into one 232,000 particles dataset. 3d  
416 refinement of this subset yielded a 4.7 Å map. A second round of 3D classification step was  
417 performed with 4 classes and a finer 7.5 degrees angular sampling. The best 3 classes were  
418 merged together for a total of 177,155 particles. Refinement of this dataset yielded a 4.2 Å  
419 map. Statistical movie processing was then performed as described previously<sup>59</sup> and the  
420 resulting map reached 3.9 Å resolution after correction for the modulation transfer function  
421 and sharpening<sup>60</sup>. Resolutions are reported according to the “gold-standard” Fourier Shell  
422 Correlation, using the 0.143 criterion<sup>61</sup>.

423 For the D02-NCP-Streptavidin and Widom 601 NCP datasets (**Supplementary Figures 3-5**)  
424 all micrographs were motion-corrected using MotionCorr2 using all frames (D02-NCP-  
425 Streptavidin) or removing the first frame (Widom 601 NCP). CTF parameters were estimated

426 using Gctf<sup>62</sup> and poor micrographs were discarded. Particles were picked in RELION-2.1  
427 using reference classes obtained from a manually-picked, 50-micrograph dataset. Two  
428 rounds of 2D classification were performed to discard poorly averaging particles. 3D  
429 classification was performed using a 50 Å, low pass filtered initial model, based on results  
430 from an *ab initio* reconstruction derived from cryoSPARC<sup>63</sup>. For the Widom 601 NCP,  
431 particles contributing to 3D classes with discernible secondary-structure features were  
432 pooled and refined using a spherical mask, and postprocessed in RELION-2.1<sup>64</sup> resulting in  
433 a 3.8 Å (C1 symmetry applied) or 3.5 Å resolution (C2 symmetry applied). For the D02-NCP-  
434 Streptavidin, a relatively smaller percentage of particles contributed to subnanometre-  
435 resolution 3D averages. This is likely because of evident flexibility of the both the exit  
436 nucleosomal DNA and the streptavidin group. To help drive streptavidin alignment and avoid  
437 artificial NCP symmetrisation, a loose mask was used in a subsequent round of 3D  
438 classification, encompassing both NCP and streptavidin. The resulting asymmetric  
439 reconstruction yielded a reconstruction with 4.6 Å (no mask) or 4.2 Å resolution (loose  
440 mask applied during refinement).

441

#### 442 **Atomic model docking and refinement**

443 For the NCP-intasome STC complex NCP (3UTB<sup>65</sup> from PDBredo) and PFV strand transfer  
444 complex (3OS0<sup>16</sup>) crystal structures were docked in the EM map using Chimera<sup>66</sup> and  
445 clashing DNA segments were removed from the model. In order to refine the voxel/pixel size  
446 of the map a series of maps were calculated with voxel/pixel size from 0.9 to 1.15 in steps of  
447 0.01 and the initial model was refined against each map using phenix.real\_space\_refine<sup>67</sup>  
448 with no additional geometry restraints. The geometry of resulting models was compared, and  
449 voxel/pixel size fine-tuned between 1.11 -1.12 in steps of 0.001. The model refined against  
450 the map with voxel/pixel size of 1.111 maintained the best geometry and was used for  
451 further model building and refinement. The model was adjusted, and sequence of protein  
452 and DNA components matched to the biological sample manually in Coot<sup>68</sup> and refined  
453 using phenix.real\_space\_refine (Nightly build version 1.10pre-2091)<sup>69</sup> and Namdinator<sup>70,71</sup>.  
454 Additional restraints describing protein secondary structure, DNA base pairing and stacking  
455 were used in Phenix. Protein geometry was assessed with Molprobit<sup>67</sup> and DNA geometry  
456 was assessed with 3DNA<sup>72</sup>. For the D02 structure, NCP structure 5MLU was used as the  
457 starting model to be independent from the NCP-intasome STC structure. The sequence was  
458 adjusted and model manually tweaked in Coot and refined using phenix.real\_space\_refine  
459 (Nightly build version phenix-dev-3374). Fine tuning of the voxel/pixel size was deemed  
460 unnecessary as the model refined without issue. Both models have reasonable  
461 stereochemistry and are in good agreement with the EM density maps.

462

### 463 **Single-Molecule FRET experiments**

464 Doubly-labelled nucleosomes were generated with a biotin on distal exit DNA and a single  
465 fluorophore donor (Cy3) attached on the proximal exit DNA end, and the acceptor  
466 fluorophore (Cy5) at H2A position 119. To generate protein-Cy5-labelled octamers H2A  
467 K119C was incorporated into octamers with H3.1 C96SC110A, H2B and H4 as described  
468 above, with an additional desalting step in a Zeba Spin column (ThermoFisher, 7K MWCO)  
469 to remove beta-mercaptoethanol. Octamers at 70  $\mu$ M (140  $\mu$ M of cysteine) were incubated  
470 with 5 mM TCEP for 10 minutes at room temperature. To achieve partial labelling, sulpho-  
471 Cy5 maleimide was added at 105  $\mu$ M for 1 hour at room temperature. The reaction was  
472 quenched by adding 5mM beta-mercaptoethanol and desalted to remove unreacted dye  
473 (ThermoFisher, 7K MWCO). The extent of labelling was quantified by measuring the  
474 595nm/280nm absorbance ratio, as well as by 2D intact mass ESI mass spectrometry. D02  
475 DNA was generated by PCR, using oligos containing Biotin-TEG-C18 and Cy3 modifications  
476 attached to the 5' termini. The PCR product was purified as described above. Nucleosomes  
477 were reconstituted as described above.

478 Single-Molecule FRET experiments were performed with freshly purified intasome  
479 complex. Quartz slides and coverslips were cleaned and passivated with methoxy-PEG-SVA  
480 ( $M_r$  = 5,000, Laysan Bio, Inc.) containing 10% biotin-PEG-SVA ( $M_r$  = 5,000, Laysan Bio, Inc.)  
481 in 100 mM sodium bicarbonate, and used to construct a microfluidic channel as described  
482 previously<sup>73</sup>. Neutravidin (0.2 mg/ml in 50 mM Tris-HCl, pH 7.5, and 50 mM NaCl) was  
483 injected in and incubated for 5 min. Excess neutravidin was washed out with intasome buffer  
484 (25 mM bis-Tris propane, pH 7.45, 240 mM NaCl, 4  $\mu$ M ZnCl<sub>2</sub> and 1 mM DTT). Biotinylated  
485 fluorescently labelled nucleosomes in intasome buffer containing 0.2 mg/ml BSA were  
486 surface immobilised by incubation in the microfluidic channel for 5 min. Excess nucleosomes  
487 were washed out and immobilised nucleosomes imaged in imaging buffer composed of  
488 intasome buffer in addition to 2 mM Trolox, oxygen scavenging system (2.5 mM 3,4-  
489 dihydroxybenzoic acid, 250 nM protocatechuate dioxygenase) and 0.2 mg/ml BSA.  
490 Experiments were performed in the absence and presence of 500 nM intasome and 5 mM  
491 magnesium. Fluorescent molecules were imaged using a custom-built prism-based total-  
492 internal reflection fluorescence (TIRF) microscope<sup>74</sup>. All measurements were recorded at  
493 room temperature (21 °C) using continuous green laser (532 nm, 2.5 mW) excitation at 100  
494 ms time resolution. Apparent FRET efficiencies were calculated as the ratio of acceptor  
495 intensity divided by the sum of acceptor and donor intensities. FRET histograms of labelled  
496 nucleosomes were obtained by calculating the mean FRET efficiency of 40-100 trajectories  
497 from multiple fields of view, as stated in the figure captions. For each experimental condition,

498 sample was prepared twice. For each preparation, and for each condition, sample was  
499 measured several times over a period of two-three days.

500

501 **Intasome strand-transfer and pull-down assays**

502 Intasome integration assays were performed as described<sup>15</sup>, briefly 5 µg of NCPs were  
503 incubated with 1.5 µg of intasome in intasome reaction buffer with and without 5mM MgCl<sub>2</sub>  
504 at 37°C for 15 minutes. The reaction was quenched by the addition of 25 mM EDTA and  
505 0.2% SDS, and DNA precipitated after proteinase K digestion. DNA was then separated on  
506 4-12% TBE polyacrylamide gels. Pull-down assays were performed as previously  
507 described<sup>15</sup>.

508

509

510 **Authors contributions**

511 AC and PC initiated the study. DPM assembled the Intasome-NCP complex and LR  
512 determined the structure. DPM performed pull-down assays. MDW performed biochemistry,  
513 assembled NCP-D02-streptavidin and NCP-601 complexes and determined the structures.  
514 VEP built all models into the EM density maps. MG performed single molecule FRET  
515 experiments and data analysis, supervised by DSR. MDW, LR and AN performed cryo-EM  
516 imaging. MDW, PC and AC wrote the manuscript with input from the authors.

517

518

519 **Acknowledgements**

520 The authors would like to thank Rishi Matadeen (formerly at NeCEN) for data collection of  
521 the NCP-intasome complex. The authors would like to thank the EM and structural biology  
522 STP at the Crick for advice, computational and technical support. Histone plasmids were a  
523 gift from Joe Landry (addgene) and 601 sequence was a gift from John Widom (addgene).  
524 We are grateful to Pavel Afonine for help with Phenix real space refinement. This work was  
525 funded jointly by the Wellcome Trust, MRC and CRUK at the Francis Crick Institute  
526 (FC0010061, FC0010065). A.C. receives funding from the European Research Council  
527 (ERC) under the European Union's Horizon 2020 research and innovation programme (grant  
528 agreement No 820102). MDW was funded by a Human frontiers Science Program long term  
529 Fellowship. The Single Molecule Imaging Group is funded by a core grant of the MRC-  
530 London Institute of Medical Sciences (UKRI MC-A658-5TY10), a Wellcome Trust  
531 Collaborative Grant (206292/Z/17/Z) and a Leverhulme Grant (RPG-2016-214).

532

533

534 **Data availability**

535 Model coordinates for the NCP-D02-streptavidin and Intasome-NCP structures are  
536 deposited in the Protein Data Bank under accession code 6RNY and 6R0C respectively.  
537 Cryo-EM maps for NCP-D02-streptavidin, NCP-601 and Intasome-NCP are available at the  
538 EMDB under codes EMD-4692, EMD-4693 and EMD-4960 respectively.

539

540

541 **Bibliography**

542

543 1. Lesbats, P., Engelman, A.N. & Cherepanov, P. Retroviral DNA Integration. *Chem*  
544 *Rev* **116**, 12730-12757 (2016).

545 2. Li, M., Mizuuchi, M., Burke, T.R., Jr. & Craigie, R. Retroviral DNA integration:  
546 reaction pathway and critical intermediates. *EMBO J* **25**, 1295-304 (2006).

547 3. Heuer, T.S. & Brown, P.O. Photo-cross-linking studies suggest a model for the  
548 architecture of an active human immunodeficiency virus type 1 integrase-DNA  
549 complex. *Biochemistry* **37**, 6667-78 (1998).

550 4. Hare, S., Gupta, S.S., Valkov, E., Engelman, A. & Cherepanov, P. Retroviral  
551 intasome assembly and inhibition of DNA strand transfer. *Nature* **464**, 232-6 (2010).

552 5. Gerton, J.L., Herschlag, D. & Brown, P.O. Stereospecificity of reactions catalyzed by  
553 HIV-1 integrase. *J Biol Chem* **274**, 33480-7 (1999).

554 6. Hare, S., Maertens, G.N. & Cherepanov, P. 3'-processing and strand transfer  
555 catalysed by retroviral integrase in crystallo. *EMBO J* **31**, 3020-8 (2012).

556 7. Luger, K., Mader, A.W., Richmond, R.K., Sargent, D.F. & Richmond, T.J. Crystal  
557 structure of the nucleosome core particle at 2.8 Å resolution. *Nature* **389**, 251-60  
558 (1997).

559 8. Richmond, T.J. & Davey, C.A. The structure of DNA in the nucleosome core. *Nature*  
560 **423**, 145-50 (2003).

561 9. Richmond, T.J., Finch, J.T., Rushton, B., Rhodes, D. & Klug, A. Structure of the  
562 nucleosome core particle at 7 Å resolution. *Nature* **311**, 532-7 (1984).

563 10. Pryciak, P.M., Sil, A. & Varmus, H.E. Retroviral integration into minichromosomes in  
564 vitro. *EMBO J* **11**, 291-303 (1992).

565 11. Pryciak, P.M. & Varmus, H.E. Nucleosomes, DNA-binding proteins, and DNA  
566 sequence modulate retroviral integration target site selection. *Cell* **69**, 769-80 (1992).

567 12. Pruss, D., Bushman, F.D. & Wolffe, A.P. Human immunodeficiency virus integrase  
568 directs integration to sites of severe DNA distortion within the nucleosome core. *Proc*  
569 *Natl Acad Sci U S A* **91**, 5913-7 (1994).

570 13. Muller, H.P. & Varmus, H.E. DNA bending creates favored sites for retroviral  
571 integration: an explanation for preferred insertion sites in nucleosomes. *EMBO J* **13**,  
572 4704-14 (1994).

573 14. Wang, G.P., Ciuffi, A., Leipzig, J., Berry, C.C. & Bushman, F.D. HIV integration site  
574 selection: analysis by massively parallel pyrosequencing reveals association with  
575 epigenetic modifications. *Genome Res* **17**, 1186-94 (2007).

576 15. Maskell, D.P. et al. Structural basis for retroviral integration into nucleosomes. *Nature*  
577 **523**, 366-9 (2015).

578 16. Maertens, G.N., Hare, S. & Cherepanov, P. The mechanism of retroviral integration  
579 from X-ray structures of its key intermediates. *Nature* **468**, 326-9 (2010).

580 17. Ballandras-Colas, A. et al. A supramolecular assembly mediates lentiviral DNA  
581 integration. *Science* **355**, 93-95 (2017).

582 18. Passos, D.O. et al. Cryo-EM structures and atomic model of the HIV-1 strand  
583 transfer complex intasome. *Science* **355**, 89-92 (2017).

584 19. Yin, Z. et al. Crystal structure of the Rous sarcoma virus intasome. *Nature* **530**, 362-  
585 6 (2016).

586 20. Ballandras-Colas, A. et al. Cryo-EM reveals a novel octameric integrase structure for  
587 betaretroviral intasome function. *Nature* **530**, 358-61 (2016).

588 21. Wigley, D.B. & Bowman, G.D. A glimpse into chromatin remodeling. *Nat Struct Mol*  
589 *Biol* **24**, 498-500 (2017).

590 22. Willhoft, O. et al. Structure and dynamics of the yeast SWR1-nucleosome complex.  
591 *Science* **362**(2018).

592 23. Cairns, B.R. Chromatin remodeling: insights and intrigue from single-molecule  
593 studies. *Nat Struct Mol Biol* **14**, 989-96 (2007).

- 594 24. Mackler, R.M. et al. Nucleosome DNA unwrapping does not affect prototype foamy  
595 virus integration efficiency or site selection. *PLoS One* **14**, e0212764 (2019).
- 596 25. Wilson, M.D. & Costa, A. Cryo-electron microscopy of chromatin biology. *Acta*  
597 *Crystallogr D Struct Biol* **73**, 541-548 (2017).
- 598 26. Davey, C.A., Sargent, D.F., Luger, K., Maeder, A.W. & Richmond, T.J. Solvent  
599 mediated interactions in the structure of the nucleosome core particle at 1.9 Å  
600 resolution. *J Mol Biol* **319**, 1097-113 (2002).
- 601 27. Bilokapic, S., Strauss, M. & Halic, M. Histone octamer rearranges to adapt to DNA  
602 unwrapping. *Nat Struct Mol Biol* **25**, 101-108 (2018).
- 603 28. Lowary, P.T. & Widom, J. New DNA sequence rules for high affinity binding to  
604 histone octamer and sequence-directed nucleosome positioning. *J Mol Biol* **276**, 19-  
605 42 (1998).
- 606 29. Wilson, M.D. et al. The structural basis of modified nucleosome recognition by  
607 53BP1. *Nature* **536**, 100-3 (2016).
- 608 30. Chua, E.Y. et al. 3.9 Å structure of the nucleosome core particle determined by  
609 phase-plate cryo-EM. *Nucleic Acids Res* **44**, 8013-9 (2016).
- 610 31. Iwasaki, W. et al. Comprehensive structural analysis of mutant nucleosomes  
611 containing lysine to glutamine (KQ) substitutions in the H3 and H4 histone-fold  
612 domains. *Biochemistry* **50**, 7822-32 (2011).
- 613 32. McGinty, R.K. & Tan, S. Nucleosome structure and function. *Chem Rev* **115**, 2255-  
614 73 (2015).
- 615 33. McGinty, R.K., Henrici, R.C. & Tan, S. Crystal structure of the PRC1 ubiquitylation  
616 module bound to the nucleosome. *Nature* **514**, 591-6 (2014).
- 617 34. Makde, R.D., England, J.R., Yennawar, H.P. & Tan, S. Structure of RCC1 chromatin  
618 factor bound to the nucleosome core particle. *Nature* **467**, 562-6 (2010).
- 619 35. Arnaudo, N. et al. The N-terminal acetylation of Sir3 stabilizes its binding to the  
620 nucleosome core particle. *Nat Struct Mol Biol* **20**, 1119-21 (2013).
- 621 36. McGinty, R.K. & Tan, S. Recognition of the nucleosome by chromatin factors and  
622 enzymes. *Curr Opin Struct Biol* **37**, 54-61 (2016).
- 623 37. Zhou, K., Gaullier, G. & Luger, K. Nucleosome structure and dynamics are coming of  
624 age. *Nat Struct Mol Biol* (2018).
- 625 38. Anderson, C.J. et al. Structural Basis for Recognition of Ubiquitylated Nucleosome by  
626 Dot1L Methyltransferase. *Cell Rep* **26**, 1681-1690 e5 (2019).
- 627 39. Worden, E.J., Hoffmann, N.A., Hicks, C.W. & Wolberger, C. Mechanism of Cross-talk  
628 between H2B Ubiquitination and H3 Methylation by Dot1L. *Cell* **176**, 1490-1501 e12  
629 (2019).
- 630 40. Valencia-Sanchez, M.I. et al. Structural Basis of Dot1L Stimulation by Histone H2B  
631 Lysine 120 Ubiquitination. *Mol Cell* (2019).
- 632 41. Jang, S. et al. Structural basis of recognition and destabilization of the histone H2B  
633 ubiquitinated nucleosome by the DOT1L histone H3 Lys79 methyltransferase. *Genes*  
634 *Dev* (2019).
- 635 42. Bilokapic, S., Strauss, M. & Halic, M. Structural rearrangements of the histone  
636 octamer translocate DNA. *Nat Commun* **9**, 1330 (2018).
- 637 43. Kujirai, T. et al. Structural basis of the nucleosome transition during RNA polymerase  
638 II passage. *Science* **362**, 595-598 (2018).
- 639 44. Ehara, H. et al. Structural insight into nucleosome transcription by RNA polymerase II  
640 with elongation factors. *Science* **363**, 744-747 (2019).
- 641 45. Liu, X., Li, M., Xia, X., Li, X. & Chen, Z. Mechanism of chromatin remodelling  
642 revealed by the Snf2-nucleosome structure. *Nature* **544**, 440-445 (2017).
- 643 46. Farnung, L., Vos, S.M., Wigge, C. & Cramer, P. Nucleosome-Chd1 structure and  
644 implications for chromatin remodelling. *Nature* **550**, 539-542 (2017).
- 645 47. Eustermann, S. et al. Structural basis for ATP-dependent chromatin remodelling by  
646 the INO80 complex. *Nature* **556**, 386-390 (2018).
- 647 48. Ayala, R. et al. Structure and regulation of the human INO80-nucleosome complex.  
648 *Nature* **556**, 391-395 (2018).



- 649 49. Sundaramoorthy, R. et al. Structure of the chromatin remodelling enzyme Chd1  
650 bound to a ubiquitinated nucleosome. *Elife* **7**(2018).
- 651 50. Sundaramoorthy, R. et al. Structural reorganization of the chromatin remodeling  
652 enzyme Chd1 upon engagement with nucleosomes. *Elife* **6**(2017).
- 653 51. Yan, L., Wu, H., Li, X., Gao, N. & Chen, Z. Structures of the ISWI-nucleosome  
654 complex reveal a conserved mechanism of chromatin remodeling. *Nat Struct Mol Biol*  
655 (2019).
- 656 52. Li, M. et al. Mechanism of DNA translocation underlying chromatin remodelling by  
657 Snf2. *Nature* **567**, 409-413 (2019).
- 658 53. Lesbats, P. et al. Functional coupling between HIV-1 integrase and the SWI/SNF  
659 chromatin remodeling complex for efficient in vitro integration into stable  
660 nucleosomes. *PLoS Pathog* **7**, e1001280 (2011).
- 661 54. Dyer, P.N. et al. Reconstitution of nucleosome core particles from recombinant  
662 histones and DNA. *Methods Enzymol* **375**, 23-44 (2004).
- 663 55. Li, X. et al. Electron counting and beam-induced motion correction enable near-  
664 atomic-resolution single-particle cryo-EM. *Nat Methods* **10**, 584-90 (2013).
- 665 56. Sorzano, C.O. et al. XMIPP: a new generation of an open-source image processing  
666 package for electron microscopy. *J Struct Biol* **148**, 194-204 (2004).
- 667 57. Scheres, S.H. RELION: implementation of a Bayesian approach to cryo-EM structure  
668 determination. *J Struct Biol* **180**, 519-30 (2012).
- 669 58. Mindell, J.A. & Grigorieff, N. Accurate determination of local defocus and specimen  
670 tilt in electron microscopy. *J Struct Biol* **142**, 334-47 (2003).
- 671 59. Bai, X.C., Fernandez, I.S., McMullan, G. & Scheres, S.H. Ribosome structures to  
672 near-atomic resolution from thirty thousand cryo-EM particles. *Elife* **2**, e00461 (2013).
- 673 60. Rosenthal, P.B. & Henderson, R. Optimal determination of particle orientation,  
674 absolute hand, and contrast loss in single-particle electron cryomicroscopy. *J Mol*  
675 *Biol* **333**, 721-45 (2003).
- 676 61. Scheres, S.H. & Chen, S. Prevention of overfitting in cryo-EM structure  
677 determination. *Nat Methods* **9**, 853-4 (2012).
- 678 62. Zhang, K. Gctf: Real-time CTF determination and correction. *J Struct Biol* **193**, 1-12  
679 (2016).
- 680 63. Punjani, A., Rubinstein, J.L., Fleet, D.J. & Brubaker, M.A. cryoSPARC: algorithms for  
681 rapid unsupervised cryo-EM structure determination. *Nat Methods* **14**, 290-296  
682 (2017).
- 683 64. Kimanius, D., Forsberg, B.O., Scheres, S.H. & Lindahl, E. Accelerated cryo-EM  
684 structure determination with parallelisation using GPUs in RELION-2. *Elife* **5**(2016).
- 685 65. Chua, E.Y., Vasudevan, D., Davey, G.E., Wu, B. & Davey, C.A. The mechanics  
686 behind DNA sequence-dependent properties of the nucleosome. *Nucleic Acids Res*  
687 **40**, 6338-52 (2012).
- 688 66. Pettersen, E.F. et al. UCSF Chimera--a visualization system for exploratory research  
689 and analysis. *J Comput Chem* **25**, 1605-12 (2004).
- 690 67. Adams, P.D. et al. PHENIX: a comprehensive Python-based system for  
691 macromolecular structure solution. *Acta Crystallogr D Biol Crystallogr* **66**, 213-21  
692 (2010).
- 693 68. Emsley, P., Lohkamp, B., Scott, W.G. & Cowtan, K. Features and development of  
694 Coot. *Acta Crystallogr D Biol Crystallogr* **66**, 486-501 (2010).
- 695 69. Afonine, P.V. et al. Real-space refinement in PHENIX for cryo-EM and  
696 crystallography. *Acta Crystallogr D Struct Biol* **74**, 531-544 (2018).
- 697 70. Trabuco, L.G., Villa, E., Schreiner, E., Harrison, C.B. & Schulten, K. Molecular  
698 dynamics flexible fitting: a practical guide to combine cryo-electron microscopy and  
699 X-ray crystallography. *Methods* **49**, 174-80 (2009).
- 700 71. Kidmose, R.T. et al. Namdinator - Automatic Molecular Dynamics flexible fitting of  
701 structural models into cryo-EM and crystallography experimental maps. *bioRxiv*  
702 *501197*.

- 703 72. Lu, X.J. & Olson, W.K. 3DNA: a software package for the analysis, rebuilding and  
704 visualization of three-dimensional nucleic acid structures. *Nucleic Acids Res* **31**,  
705 5108-21 (2003).
- 706 73. Lamichhane, R., Solem, A., Black, W. & Rueda, D. Single-molecule FRET of protein-  
707 nucleic acid and protein-protein complexes: surface passivation and immobilization.  
708 *Methods* **52**, 192-200 (2010).
- 709 74. Zhao, R. & Rueda, D. RNA folding dynamics by single-molecule fluorescence  
710 resonance energy transfer. *Methods* **49**, 112-7 (2009).
- 711
